# Supplementary material for: Therapeutic downregulation of neuronal PAS domain 2 (Npas2) promotes surgical skin wound healing
Source: eLife. 2022 Jan 18;11:e71074. doi: 10.7554/eLife.71074 (PMC8789286; doi:10.7554/eLife.71074)
Supplement: Figure 1—source data 1. [file elife-71074-fig1-data1.xlsx]

## Sheet: Fig. 1
Therapeutic downregulation of neuronal PAS domain 2 (Npas2) promotes surgical skin wound healing
Figure 1 raw numerical data
Fig. 1b		day1	day2	day3	day4	day5	day6	day7
		7.3	7.36667	6.93333	5.16667	6.2	5.33333	3.93333
		5.66667	4.6	7.1	6.76667	4.93333	7.96667	3
		5.16667	5.4	6.8	6.26667	4.66667	5.4	3.33333
		6.16667	4.73333	6.63333	5.9	5.6	6.93333	5.13333
		6.6	4.73333	6	5.7	5.16667	5.66667	3.33333
Fig. 1e		Center	Periphery
	T4-1L	224.206	1271.94
	T4-2R	189.683	421.631
	T4-4R	164.608	205.952
	T4-5L	116.987	460.008
	T4-6R	203.972	361.056
Fig. 1f		Granulation		Wound edge
		N (Periphery)	N (Center)	N (Periphery)	N (Center)
		29.4645	0.726817	51.673	0.0840488
		16.6779	2.66678	49.7324	3.33248
		23.71	0.0849825	22.4436	2.89759
		16.5054	1.74663	52.5215	7.82042
			7.4051		9.26463
