# Supplementary material for: Therapeutic downregulation of neuronal PAS domain 2 (Npas2) promotes surgical skin wound healing
Source: eLife. 2022 Jan 18;11:e71074. doi: 10.7554/eLife.71074 (PMC8789286; doi:10.7554/eLife.71074)
Supplement: Figure 2—source data 1. [file elife-71074-fig2-data1.xlsx]

## Sheet: Fig. 2
Therapeutic downregulation of neuronal PAS domain 2 (Npas2) promotes surgical skin wound healing
Figure 2 raw numerical data
Fig. 2b		CTRL			Dwn1
	24	0.313196	3.71832	5.6644	1.81221	0.110102	0.0353586
	30	0.78807	0.340312	0.209103	0.144705	0.148032	0.0267313
	36	7.21337	8.95514	3.04988	2.77169	5.74223	1.55917
	42	0.330777	0.665426	0.17379	0.264029	0.246034	0.121734
	48	0.315675	0.425038	0.101931	0.179107	0.210355	0.311568
Fig. 2c		CTRL					Dwn1
	12h	49	73	45	68	46	96	94	82	77	74
	24h	79	105	72	100	58	155	140	133	130	118
	36h	119	128	94	117	72	192	201	145	183	171
	48h	145	133	109	127	87	232	248	179	214	203
Fig. 2d		CTRL					Dwn1
	12h	75	89	76	78	66	75	99	88	64	77
	24h	142	152	132	135	107	117	161	158	103	115
	36h	208	215	179	168	163	166	222	224	162	165
	48h	269	261	226	197	214	209	273	284	190	226
