# Supplementary material for: Therapeutic downregulation of neuronal PAS domain 2 (Npas2) promotes surgical skin wound healing
Source: eLife. 2022 Jan 18;11:e71074. doi: 10.7554/eLife.71074 (PMC8789286; doi:10.7554/eLife.71074)
Supplement: Figure 3—source data 1. [file elife-71074-fig3-data1.xlsx]

## Sheet: Fig. 3
Therapeutic downregulation of neuronal PAS domain 2 (Npas2) promotes surgical skin wound healing
Figure 3 raw numerical data
Fig. 3a		CTRL			Vehicle			Dwn1 (1 µM)			Dwn1 (10 µM)
	Day 3	0.363	0.312	0.309	0.482	0.423	0.377	0.434	0.334	0.346	0.33	0.296	0.348
	Day 7	0.247	0.278	0.265	0.668	0.583	0.628	0.435	0.424	0.469	0.458	0.423	0.508
Fig. 3b	Col1a1	Vehicle			Dwn1 (1 µM)			Dwn1 (10µM)
	Day 3	0.82	0.86	0.93	0.81	0.8	0.83	0.48	0.49	0.5
	Day 7	0.96	1.08	0.97	1	0.93	0.96	1.16	1.2	1.3
	Col1a2	Vehicle			Dwn1 (1 µM)			Dwn1 (10µM)
	Day 3	0.88	0.85	0.84	0.86	0.84	0.83	0.62	0.65	0.58
	Day 7	1.34	1.25	1.28	1.29	1.37	1.31	1	1.02	0.98
	Col3a1	Vehicle			Dwn1 (1 µM)			Dwn1 (10µM)
	Day 3	1.16548	0.982005	0.948432	0.995997	0.98114	0.98968	0.568925	0.566435	0.477154
	Day 7	2.69879	2.7011	2.72077	2.67328	2.54728	2.42231	2.10133	1.97982	1.94106
	Col14a1	Vehicle			Dwn1 (1 µM)			Dwn1 (10µM)
	Day 3	1.41	1.04	0.52	0.98	1.35	0.95	0.5	0.6	0.57
	Day 7	10.04	12.51	11.4	13.14	17.33	13.77	34.98	31.39	34.85
