# Supplementary material for: Therapeutic downregulation of neuronal PAS domain 2 (Npas2) promotes surgical skin wound healing
Source: eLife. 2022 Jan 18;11:e71074. doi: 10.7554/eLife.71074 (PMC8789286; doi:10.7554/eLife.71074)
Supplement: Figure 4—source data 1. [file elife-71074-fig4-data1.xlsx]

## Sheet: Fig. 4
Therapeutic downregulation of neuronal PAS domain 2 (Npas2) promotes surgical skin wound healing
Figure 4 raw numerical data
Fig. 4b		Vehicle					Dwn1
	D1	8.06667	5.96667	5.76667	2.43333	5.33333	6.2	5.23333	4.73333	1.96667	4.8	5.2
	D2	6.1	5.66667	5.36667	2.86667	4.26667	4.3	3.96667	4.76667	2.5	4.7	1.43333
	D3	7.2	5.96667	6.43333	2.03333	4.93333	6.96667	4.9	3.76667	1.63333	4.13333	1.73333
	D4	6.23333	5.03333	5.96667	1.8	3.1	4.66667	4.2	4.46667	0.866667	3.96667	1
	D5	6.66667	6.06667	5.9	2.6	4.26667	6.6	4.43333	5.93333	0.7	3.86667	0.766667
	D6	6.86667	6.56667	6.5	2.03333	2.36667	5.86667	3.23333	4.8	0.866667	2.36667	0.933333
	D7	4.8	4.7	1.73333	1.36667	0.633333		3.33333	1.23333	0.366667	1.26667	0.566667
Fig. 4d	Vehicle	Dwn1
	1615.47	441.059
	3694.64	689.382
	3350.1	498.669
	1245.47	200.72
	653.554	33.8337
Fig. 4e		Vehicle					Dwn1
	Granulation	31.5465	20.5005	16.0609	15.6045	13.6865	9.59189	12.5468	1.48907	2.49188	2.04557
	Wound edge	41.0207	17.794	20.71	13.0779	9.81715	8.25051	23.2871	10.9867	6.37627	2.37392
Fig. 4f	D7		D14
	Vehicle	Dwn1	Vehicle	Dwn1	unwounded
	0.1616	1.6486	2.0039	2.3384	4.8331
	0.7789	1.0025	1.3724	1.9191	5.7687
	0.2635	3.4935	2.3528	2.5224	3.3304
	0.5695	0.9153	2.1603	4.4649	4.5023
	0.3508	1.4516	2.7067	2.032	3.8927
	0.2062	0.467	2.4985	3.4369	6.0375
	0.1958	0.6034	1.6352	6.3258	5.0367
	0.0968	3.7695	1.5847	3.6605	2.6001
