# Supplementary material for: Therapeutic downregulation of neuronal PAS domain 2 (Npas2) promotes surgical skin wound healing
Source: eLife. 2022 Jan 18;11:e71074. doi: 10.7554/eLife.71074 (PMC8789286; doi:10.7554/eLife.71074)
Supplement: Figure 5—source data 1. [file elife-71074-fig5-data1.xlsx]

## Sheet: Fig. 5
Therapeutic downregulation of neuronal PAS domain 2 (Npas2) promotes surgical skin wound healing
Figure 5 raw numerical data
Fig. 5b	col1a1	G		W			col1a2	G		W
		Vehicle	Dwn1	Vehicle	Dwn1			Vehicle	Dwn1	Vehicle	Dwn1
		1.94506	5.35373	3.63145	0.409247			1.01682	3.37269	0.732335	0.379007
		3.07476	0.346393	3.24105	0.0201836			2.73096	0.328274	2.80853	0.016535
		3.20022	0.660547	4.39618	0.353972			4.74799	0.661762	1.77615	0.382222
		7.18379	4.42104	2.47074	2.03101			5.83206	2.73301	2.35722	1.34542
	col3a1	G		W			col14a1	G		W
		Vehicle	Dwn1	Vehicle	Dwn1			Vehicle	Dwn1	Vehicle	Dwn1
		2.25994	3.58409	1.64299	0.400793			3.38438	2.6842	1.72008	0.607804
		6.7816	0.628227	1.612	0.0365437			22.475	4.13641	3.34217	0.0466186
		3.08359	1.06203	3.2134	0.321531			7.61667	0.140726	4.44995	0.4341
		2.36399	4.62015	2.35556	1.57354			2.84465	1.06637	0.556359	0.662388
		6.90181
	Tgfb1	G		W			Acta2	G		W
		Vehicle	Dwn1	Vehicle	Dwn1			Vehicle	Dwn1	Vehicle	Dwn1
		2.88077	3.41698	1.16275	0.530246			0.574019	1.62971	1.1217	0.223333
		1.25717	2.07314	0.853023	0.07594			3.3618	0.0869346	1.4095	0.0503993
		1.35799	0.335986	0.898815	0.496146			3.44971	1.12654	1.14346	0.814397
		1.68846	1.56808	0.909815	0.371781			1.03658	3.58974	1.26967	0.231461
